# Supplementary material for: TRK Protein Expression in Merkel Cell Carcinoma Is Not Caused by NTRK Fusions
Source: MDPI journal article supplement (doi:10.3390/ijms232315366), 2022-12-06
Supplement: s1 [file s1]

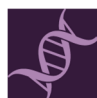

**Table S1.** Association between TRK expression and clinicopathological features.

| Comparison                                | Variable                 | Groups                                |                                          | p-value |
|-------------------------------------------|--------------------------|---------------------------------------|------------------------------------------|---------|
| <b>Pan-TRK expression</b>                 |                          | <b>Negative pan-TRK</b>               | <b>Positive pan-TRK</b>                  |         |
|                                           | N                        | 42                                    | 34                                       | -       |
|                                           | Age, years: median (IQR) | 75 (68-83)                            | 69 (64-78)                               | 0.06    |
|                                           | Males: n (%)             | 17 (40)                               | 19 (56)                                  | 0.29    |
|                                           | Primary site, n (%):     |                                       |                                          | 0.22    |
|                                           | Extremities              | 21 (50)                               | 24 (71)                                  |         |
|                                           | Eyelid                   | 3 (7)                                 | 0                                        |         |
| <b>Membranous TRK expression pattern</b>  | HN                       | 13 (31)                               | 7 (20)                                   |         |
|                                           | Trunk                    | 5 (12)                                | 3 (9)                                    |         |
|                                           | MCPyV positive: n (%)    | 26 (62)                               | 17 (50)                                  | 0.42    |
|                                           |                          | <b>Not-membranous TRK expression</b>  | <b>Membranous TRK expression pattern</b> |         |
|                                           | N                        | 15                                    | 19                                       | -       |
|                                           | Age, years: median (IQR) | 67 (62-77)                            | 70 (65-81)                               | 0.37    |
|                                           | Males: n (%)             | 9 (60)                                | 10 (53)                                  | 0.74    |
| <b>Cytoplasmic TRK expression pattern</b> | Primary site, n (%):     |                                       |                                          | 0.11    |
|                                           | Extremities              | 10 (67)                               | 14 (74)                                  |         |
|                                           | Eyelid                   | 2 (13)                                | 5 (26)                                   |         |
|                                           | HN                       | 3 (20)                                | 0 (0)                                    |         |
|                                           | Trunk                    |                                       |                                          |         |
|                                           | MCPyV positive: n (%)    | 8 (53)                                | 9 (47)                                   | 0.99    |
|                                           |                          | <b>Not-cytoplasmic TRK expression</b> | <b>Cytoplasmic TRK expression</b>        |         |
| <b>Dot-like TRK expression pattern</b>    | N                        | 5                                     | 29                                       | -       |
|                                           | Age, years: median (IQR) | 66 (63-69)                            | 70 (65-78)                               | 0.73    |
|                                           | Males: n (%)             | 3 (60)                                | 16 (55)                                  | 0.99    |
|                                           | Primary site, n (%):     |                                       |                                          | 0.99    |
|                                           | Extremities              | 4 (80)                                | 20 (69)                                  |         |
|                                           | Eyelid                   | 1 (20)                                | 6 (21)                                   |         |
|                                           | HN                       | 0 (0)                                 | 3 (10)                                   |         |
| <b>Dot-like TRK expression pattern</b>    | Trunk                    |                                       |                                          |         |
|                                           | MCPyV positive: n (%)    | 1 (20)                                | 16 (55)                                  | 0.34    |
|                                           |                          | <b>Not dot-like TRK expression</b>    | <b>Dot-like TRK expression</b>           |         |
|                                           | N                        | 23                                    | 10                                       | -       |
|                                           | Age, years: median (IQR) | 67 (62-79)                            | 72 (66-77)                               | 0.38    |
|                                           | Males: n (%)             | 14 (61)                               | 4 (40)                                   | 0.45    |
|                                           | Primary site, n (%):     |                                       |                                          | 0.72    |
| <b>Nuclear TRK expression pattern</b>     | Extremities              | 15 (65)                               | 8 (80)                                   |         |
|                                           | Eyelid                   | 6 (26)                                | 1 (10)                                   |         |
|                                           | HN                       | 2 (9)                                 | 1 (10)                                   |         |
|                                           | Trunk                    |                                       |                                          |         |
|                                           | MCPyV positive: n (%)    | 13 (57)                               | 4 (40)                                   | 0.46    |
|                                           |                          | <b>Not-nuclear TRK expression</b>     | <b>Nuclear TRK expression</b>            |         |
|                                           | N                        | 28                                    | 6                                        | -       |
| <b>Nuclear TRK expression pattern</b>     | Age, years: median (IQR) | 69 (62-78)                            | 68 (66-74)                               | 0.79    |

|  |                       |         |        |             |
|--|-----------------------|---------|--------|-------------|
|  | Males: n (%)          | 15 (54) | 4 (67) | 0.67        |
|  | Primary site, n (%):  |         |        | 0.78        |
|  | Extremities           | 20 (72) | 4 (66) |             |
|  | Eyelid                | 6 (21)  | 1 (17) |             |
|  | HN                    | 2 (7)   | 1 (17) |             |
|  | Trunk                 |         |        |             |
|  | MCPyV positive: n (%) | 17 (61) | 0 (0)  | <b>0.02</b> |

IQR: interquartile range. Information on dot-like TRK expression pattern was not available in one patient.

**Table S2.** Analysis of survival.

| Variable                                                     | Recurrence/progression-free survival   |         | Overall survival                       |         |
|--------------------------------------------------------------|----------------------------------------|---------|----------------------------------------|---------|
|                                                              | Hazard ratio (95% confidence interval) | p-value | Hazard ratio (95% confidence interval) | p-value |
| Negative pan-TRK<br>Positive pan-TRK                         | Reference<br>1.39 (0.69 to 2.77)       | 0.36    | Reference<br>1.01 (0.56 to 1.84)       | 0.97    |
| Not-membranous TRK expression<br>Membranous TRK expression   | Reference<br>1.03 (0.38 to 2.76)       | 0.96    | Reference<br>1.02 (0.41 to 2.53)       | 0.97    |
| Not-cytoplasmic TRK expression<br>Cytoplasmic TRK expression | Reference<br>0.58 (0.16 to 2.039)      | 0.39    | Reference<br>0.61 (0.20 to 1.87)       | 0.38    |
| Not dot-like TRK expression<br>Dot-like TRK expression       | Reference<br>0.76 (0.24 to 2.40)       | 0.64    | Reference<br>1.41 (0.51 to 3.90)       | 0.51    |
| Not-nuclear TRK expression<br>Nuclear TRK expression         | Reference<br>0.34 (0.05 to 2.60)       | 0.30    | Reference<br>2.14 (0.76 to 6.03)       | 0.15    |

**Table S3.** List of detectable gene alterations with the Easy PGX ready NTRK fusion test.

|                            |                                                                                                                                                                             |
|----------------------------|-----------------------------------------------------------------------------------------------------------------------------------------------------------------------------|
| <i>NTRK1</i> exon 9-10     | <i>TFG-NTRK1</i> T5:N9<br><i>NFASC-NTRK1</i> N20:N10<br><i>NFASC-NTRK1</i> N21:N10                                                                                          |
| <i>NTRK1</i> exon 10       | <i>SQSTM1-NTRK1</i> S4:N10<br><i>TFG-NTRK1</i> T5:N10<br><i>TPM3-NTRK1</i> T7:N10<br><i>TPR-NTRK1</i> T21:N10<br><i>TRIM63-NTRK1</i> T8:N10                                 |
| <i>NTRK1</i> exon 11-12del | <i>BCAN-NTRK1</i> B13:N11<br><i>LMNA-NTRK1</i> L11del178:N11<br><i>LMNA-NTRK1</i> L2:N11<br><i>PPL-NTRK1</i> P22del2181:N11<br><i>TPR-NTRK1</i> T6del122:N12del99           |
| <i>NTRK1</i> exon 12       | <i>MPRIP-NTRK1</i> M21:N12<br><i>MPRIP-NTRK1</i> M18:N12<br><i>MPRIP-NTRK1</i> M14:N12<br><i>SCYL3-NTRK1</i> S11:N12<br><i>TPM3-NTRK1</i> T7:N12<br><i>TPR-NTRK1</i> T6:N12 |
| <i>NTRK2</i> exon 12-15    | <i>AFAP1-NTRK2</i> A13:N12<br><i>VCL-NTRK2</i> V16:N12<br><i>TLE4-NTRK2</i> T7:N15<br><i>TRIM24-NTRK2</i> T12:N15                                                           |
| <i>NTRK2</i> exon 16-17    | <i>AGBL4-NTRK2</i> A6:N16<br><i>QKI-NTRK2</i> Q6:N16<br><i>SQSTM1-NTRK2</i> S4:N16<br><i>STRN-NTRK2</i> S3:N16<br><i>SQSTM1-NTRK2</i> S4:N17                                |
| <i>NTRK3</i> exon 14       | <i>ETV6-NTRK3</i> E4:N14<br><i>ETV6-NTRK3</i> E5:N14                                                                                                                        |
| <i>NTRK3</i> exon 15       | <i>ETV6-NTRK3</i> E4:N15<br><i>ETV6-NTRK3</i> E5:N15                                                                                                                        |
